# Supplementary material
Source: publisher site journal article supplement (https://www.spandidos-publications.com/7677/downloadSupplementary)

Figure S1. Quality assessment of included literature. The overall quality of the selected literature was relatively high.

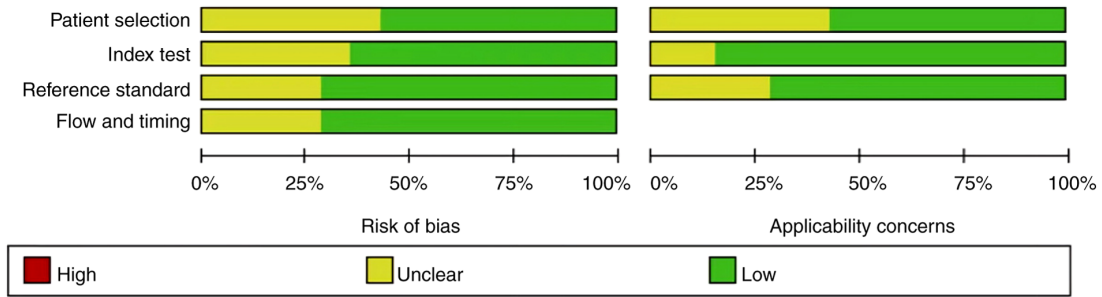

|                               | Risk of bias      |            |                    |                 | Applicability concerns |            |                    |
|-------------------------------|-------------------|------------|--------------------|-----------------|------------------------|------------|--------------------|
|                               | Patient selection | Index test | Reference standard | Flow and timing | Patient selection      | Index test | Reference standard |
| Andolfo <i>et al</i> , 2011   | ?                 | ?          | +                  | +               | ?                      |            | +                  |
| Bian <i>et al</i> , 2023      | +                 | +          | +                  | +               | +                      | +          | +                  |
| Bian <i>et al</i> , 2024      | +                 | ?          | +                  | ?               | +                      | +          | +                  |
| Boldrin <i>et al</i> , 2020   | +                 | ?          | ?                  | ?               | +                      | +          | ?                  |
| Chen <i>et al</i> , 2024      | +                 | +          | ?                  | +               | +                      | +          | ?                  |
| Li <i>et al</i> , 2011        | +                 | ?          | +                  | +               | ?                      | ?          | +                  |
| Li <i>et al</i> , 2024        | +                 | ?          | +                  | +               | +                      | +          | +                  |
| Liu <i>et al</i> , 2020       | ?                 | +          | +                  | +               | ?                      | +          | +                  |
| Nicholson <i>et al</i> , 2023 | ?                 | +          | +                  | ?               | ?                      | +          | +                  |
| Qiao <i>et al</i> , 2021      | +                 | +          | ?                  | +               | +                      | ?          | ?                  |
| Vavoulis <i>et al</i> , 2023  | ?                 | +          | +                  | +               | ?                      | +          | +                  |
| Wang <i>et al</i> , 2012      | ?                 | +          | +                  | +               | ?                      | +          | +                  |
| Wang <i>et al</i> , 2018      | +                 | +          | ?                  | +               | +                      | +          | +                  |
| Zhai <i>et al</i> , 2012      | ?                 | +          | +                  | ?               | +                      | +          | ?                  |

Figure S2. Forest plots of pooled PLR and NLR for circulating free DNA. PLR, positive likelihood ratio; NLR, negative likelihood ratio; CI, confidence interval.

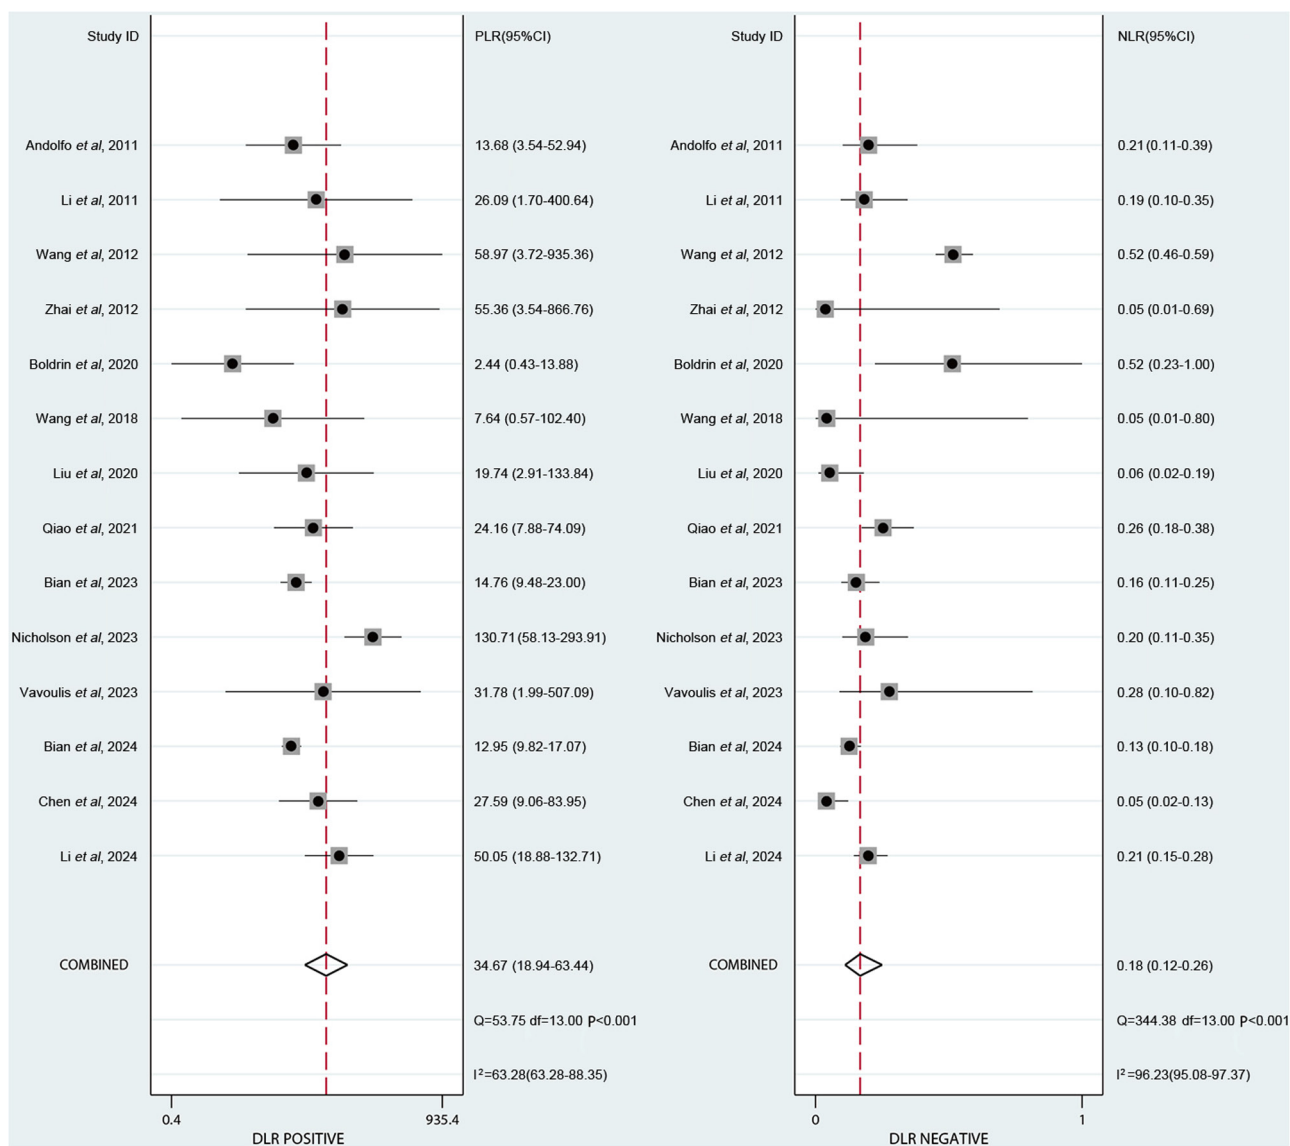

Figure S3. Forest plots of pooled diagnostic odds ratio for circulating free DNA. CI, confidence interval.

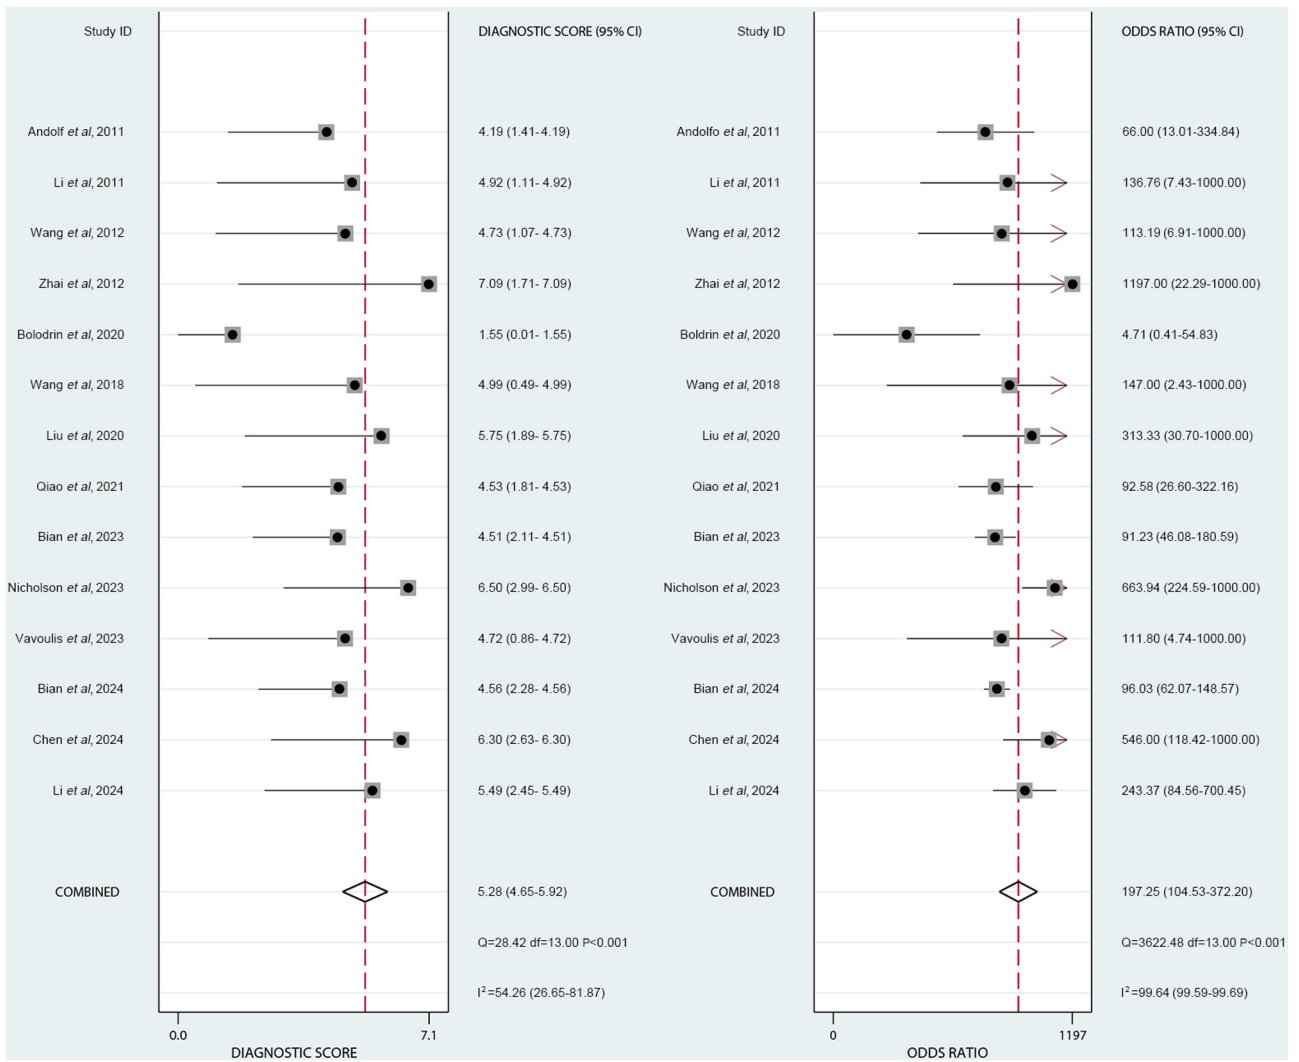

Figure S4. Funnel plot.  $P > 0.05$  and the symmetry of the distribution suggests the absence of publication bias among the studies included. CI, confidence interval; logdor, logarithmic discounted odds ratio; *inv\_root\_ess*, inverse square root of effective sample size.

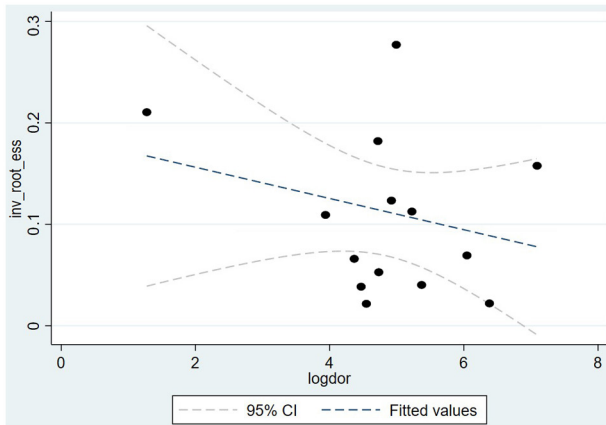

Supplement: Supplementary file 1 [file downloadSupplementary]
